# Supplementary material for: Enhancers with tissue-specific activity are enriched in intronic regions
Source: PubMed Central journal article supplement — Genome Res. 2021 Aug;31(8):1325–36. doi: 10.1101/gr.270371.120 (PMC8327915; doi:10.1101/gr.270371.120), 2021-08
Supplement: supp_gr.270371.120_Supplementary_Material.pdf [file supp_gr.270371.120_Supplementary_Material.pdf]

## Supplementary Figures and Tables

## List of Figures

|   |                      |       |
|---|----------------------|-------|
| 1 | Supplementary Fig. 1 | ..... |
| 2 | Supplementary Fig. 2 | ..... |
| 3 | Supplementary Fig. 3 | ..... |
| 4 | Supplementary Fig. 4 | ..... |
| 5 | Supplementary Fig. 5 | ..... |
| 6 | Supplementary Fig. 6 | ..... |
| 7 | Supplementary Fig. 7 | ..... |

## List of Tables

|    |                        |       |
|----|------------------------|-------|
| 1  | Supplementary Table 1  | ..... |
| 2  | Supplementary Table 2  | ..... |
| 3  | Supplementary Table 3  | ..... |
| 4  | Supplementary Table 4  | ..... |
| 5  | Supplementary Table 5  | ..... |
| 6  | Supplementary Table 6  | ..... |
| 7  | Supplementary Table 7  | ..... |
| 8  | Supplementary Table 8  | ..... |
| 9  | Supplementary Table 9  | ..... |
| 10 | Supplementary Table 10 | ..... |
| 11 | Supplementary Table 11 | ..... |
| 12 | Supplementary Table 12 | ..... |
| 13 | Supplementary Table 13 | ..... |
| 14 | Supplementary Table 14 | ..... |
| 15 | Supplementary Table 15 | ..... |
| 16 | Supplementary Table 16 | ..... |
| 17 | Supplementary Table 17 | ..... |

**A**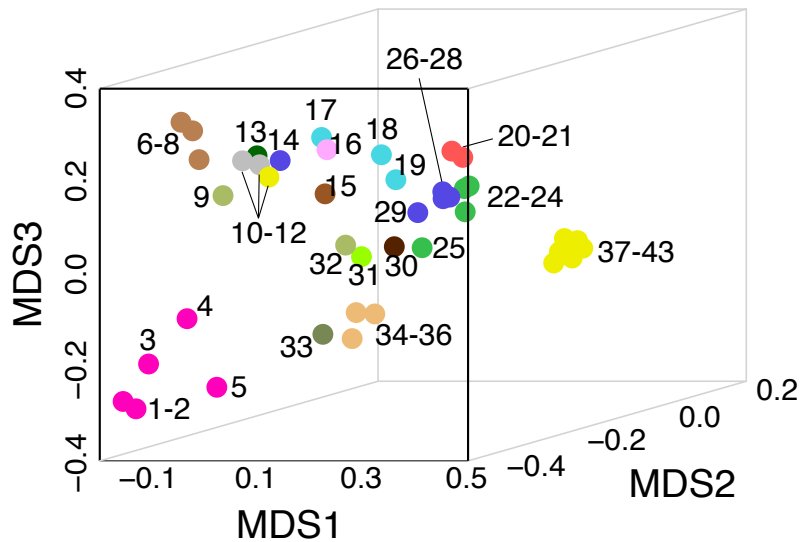**B**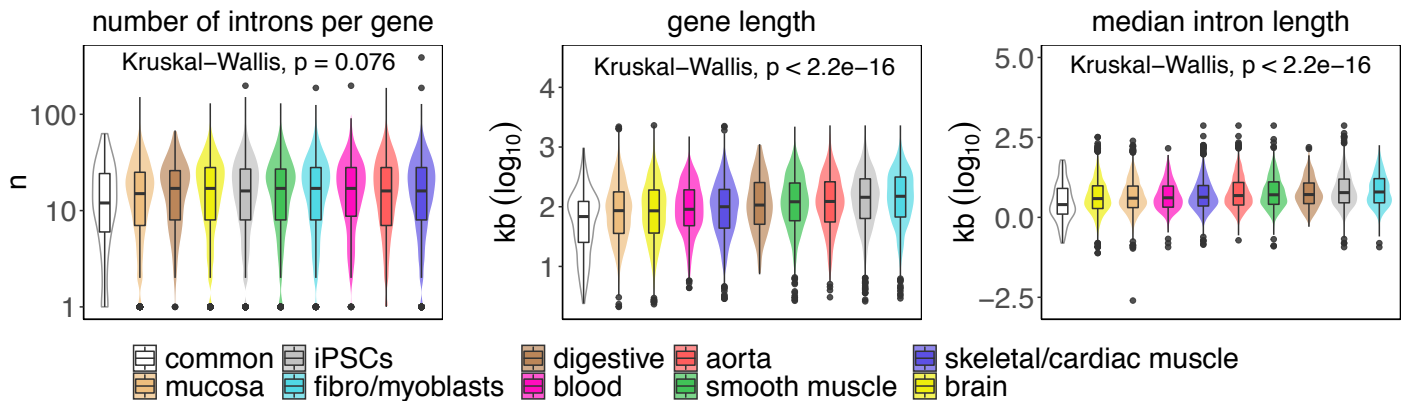**C**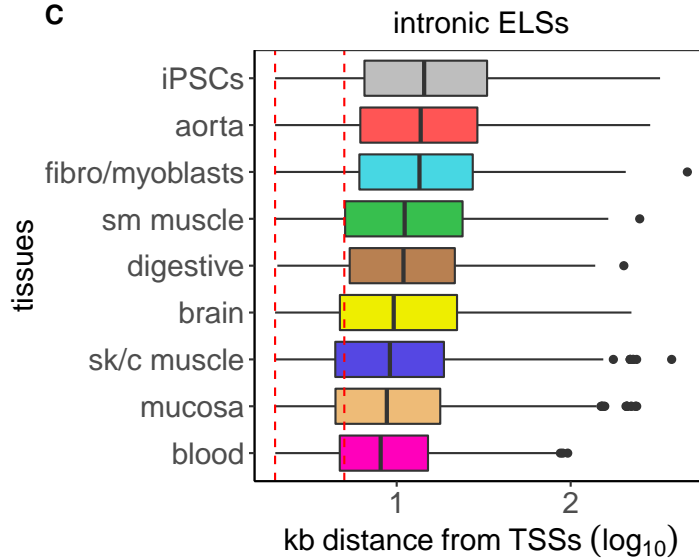

**Supplementary Fig. 1. A:** Multidimensional scaling (MDS) representation of the dissimilarities among the 43 human adult samples based on the pattern of activity of ELS-cCREs. The binary distance between a given pair of samples was computed considering presence/absence vectors of 921,166 distal ELSs ( $\pm 2$  kb from any annotated TSS). The correspondence between samples and numbers is reported in Supplementary Table 1 in Supplementary\_File.pdf. **B:** Features of genes hosting intronic ELSs in each cluster of adult samples: (1) number of introns per hosting gene, (2) length of hosting gene, (3) median intron length per hosting gene. **C:** Distributions of distances of tissue-specific intronic ELSs from annotated TSSs. The minimum distance from either the start or the end of every ELS was considered. Vertical dashed red lines correspond to 2 and 5 kb. sk/c = skeletal/cardiac; sm = smooth.

**A**

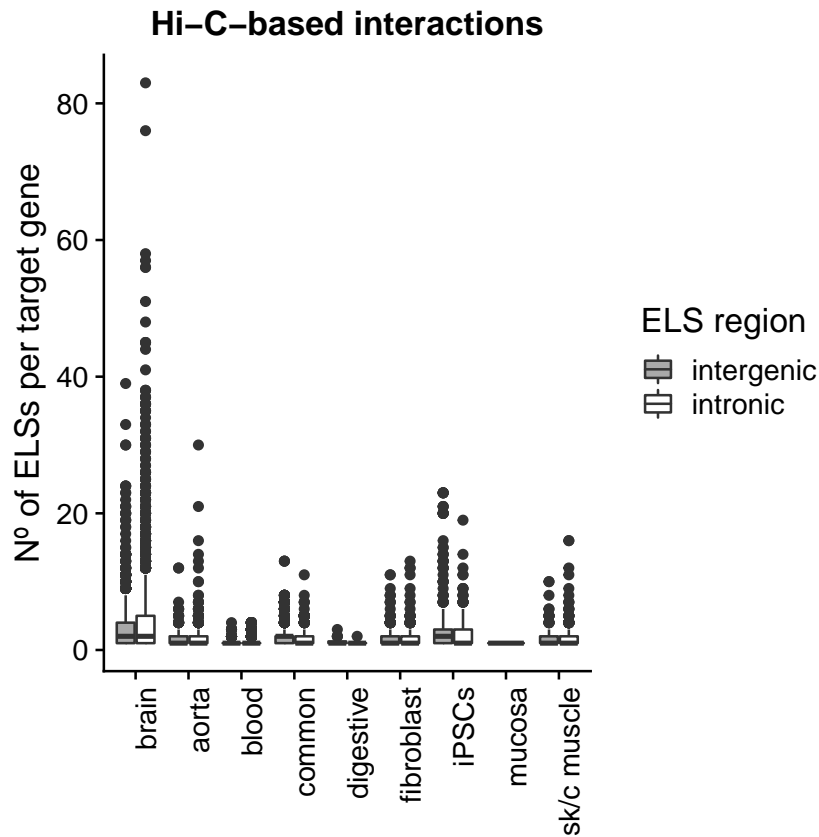

**B**

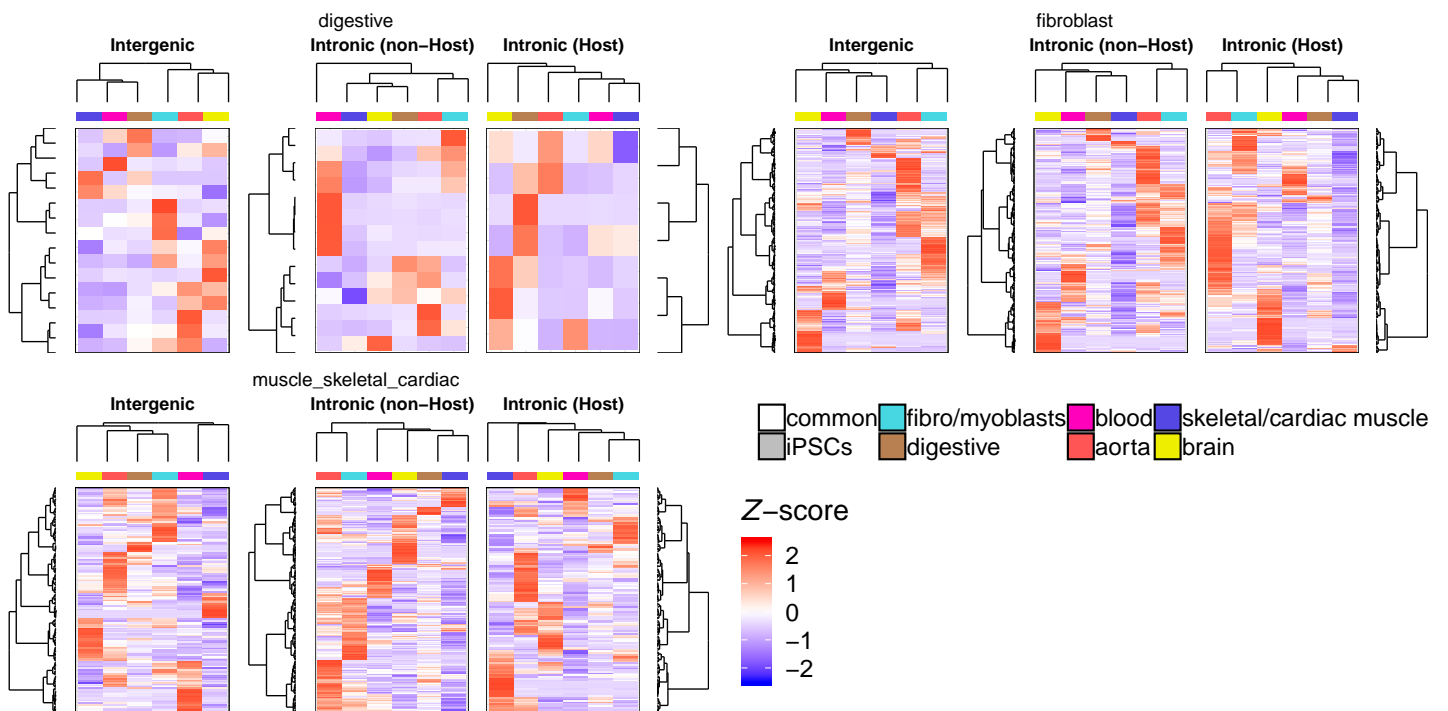

**Supplementary Fig. 2. A:** Distributions of the number of common and tissue-specific ELSs regulating a single target gene according to the Hi-C-based data. sk/c = skeletal/cardiac. **B:** Z-score normalized median gene expression across GTEx tissue categories of the genes targeted by intergenic and intronic Hi-C-ELs in digestive, fibroblast and skeletal/cardiac muscle tissues. Intronic Hi-C-ELs are distinguished between those targeting their host gene (Host), and those that target a gene that is not their host gene (non-Host). Dendrograms show the hierarchical clustering of target genes (rows) and GTEx tissue categories (columns).

**A**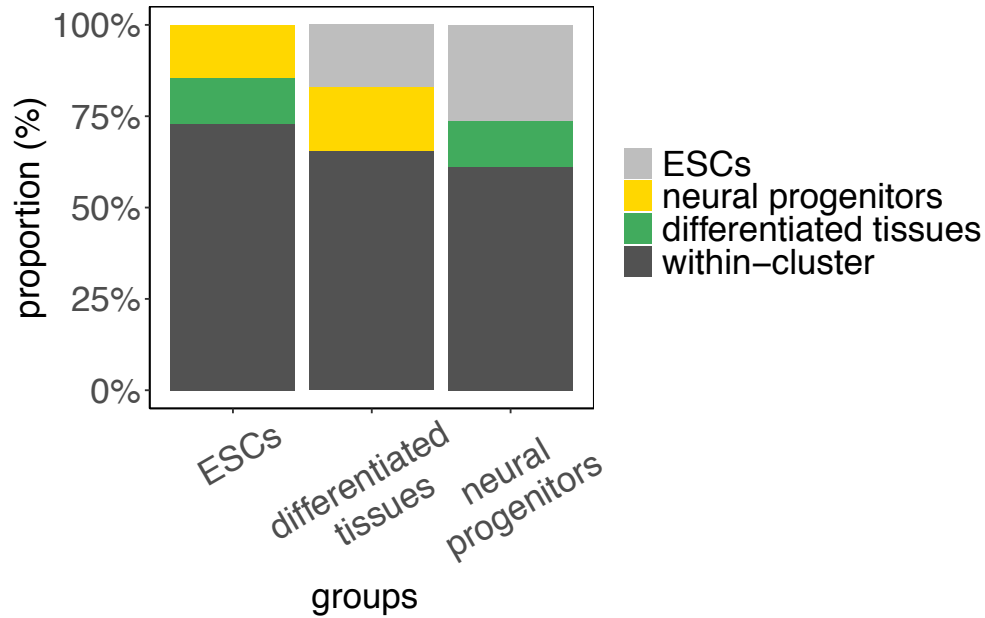**B**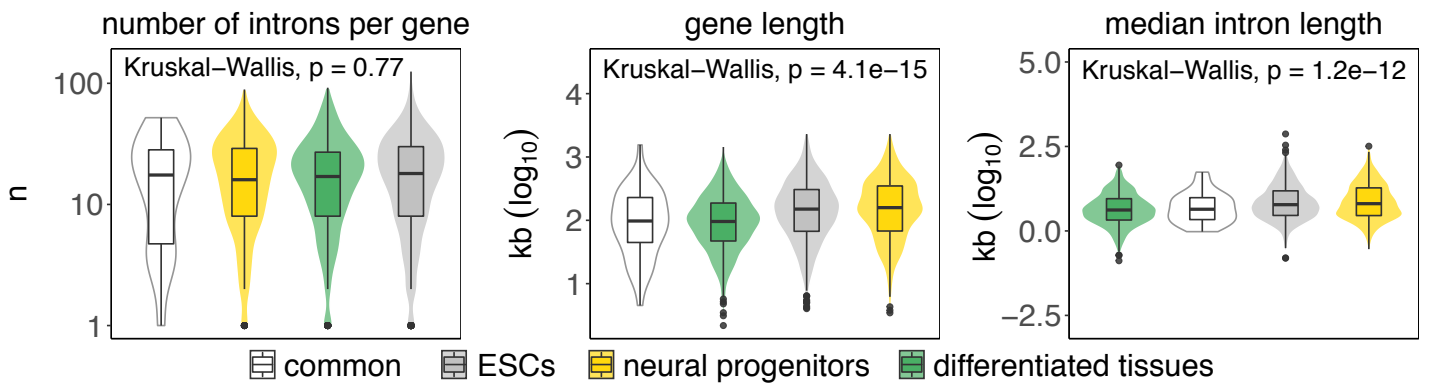**C**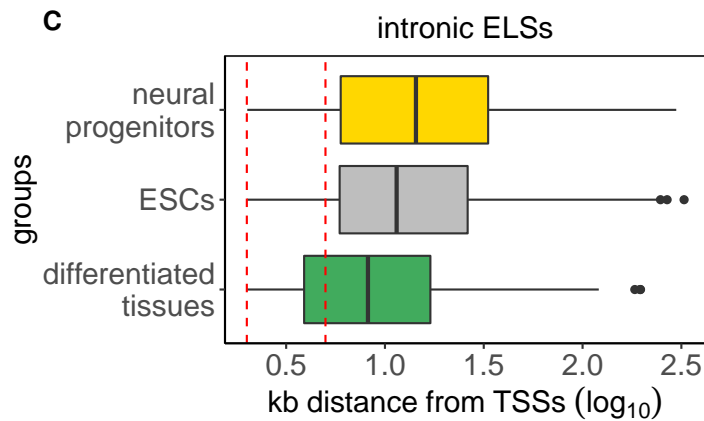

**Supplementary Fig. 3. A:** Group-specific ELSs in embryonic samples (analogous to Fig. 1D). The barplot represents the type of outer samples observed within sets of ESCs-, differentiated tissues- and neural progenitors-specific ELSs. **B:** Features of genes hosting either common or specific intronic ELSs identified in embryonic samples (analogous to Supplementary Fig. 1B in Supplementary\_File.pdf): (1) number of introns per hosting gene, (2) length of hosting gene, (3) median intron length per hosting gene. **C:** Distributions of distances of group-specific intronic ELSs from annotated TSSs (analogous to Supplementary Fig. 1C in Supplementary\_File.pdf). The minimum distance from either the start or the end of every ELS was considered. Vertical dashed red lines correspond to 2 and 5 kb.

**A**

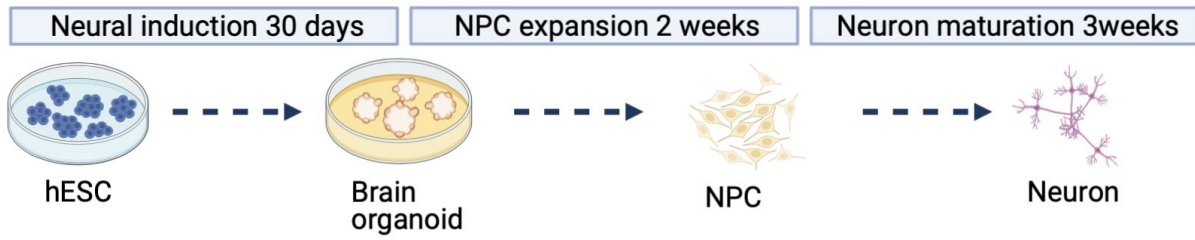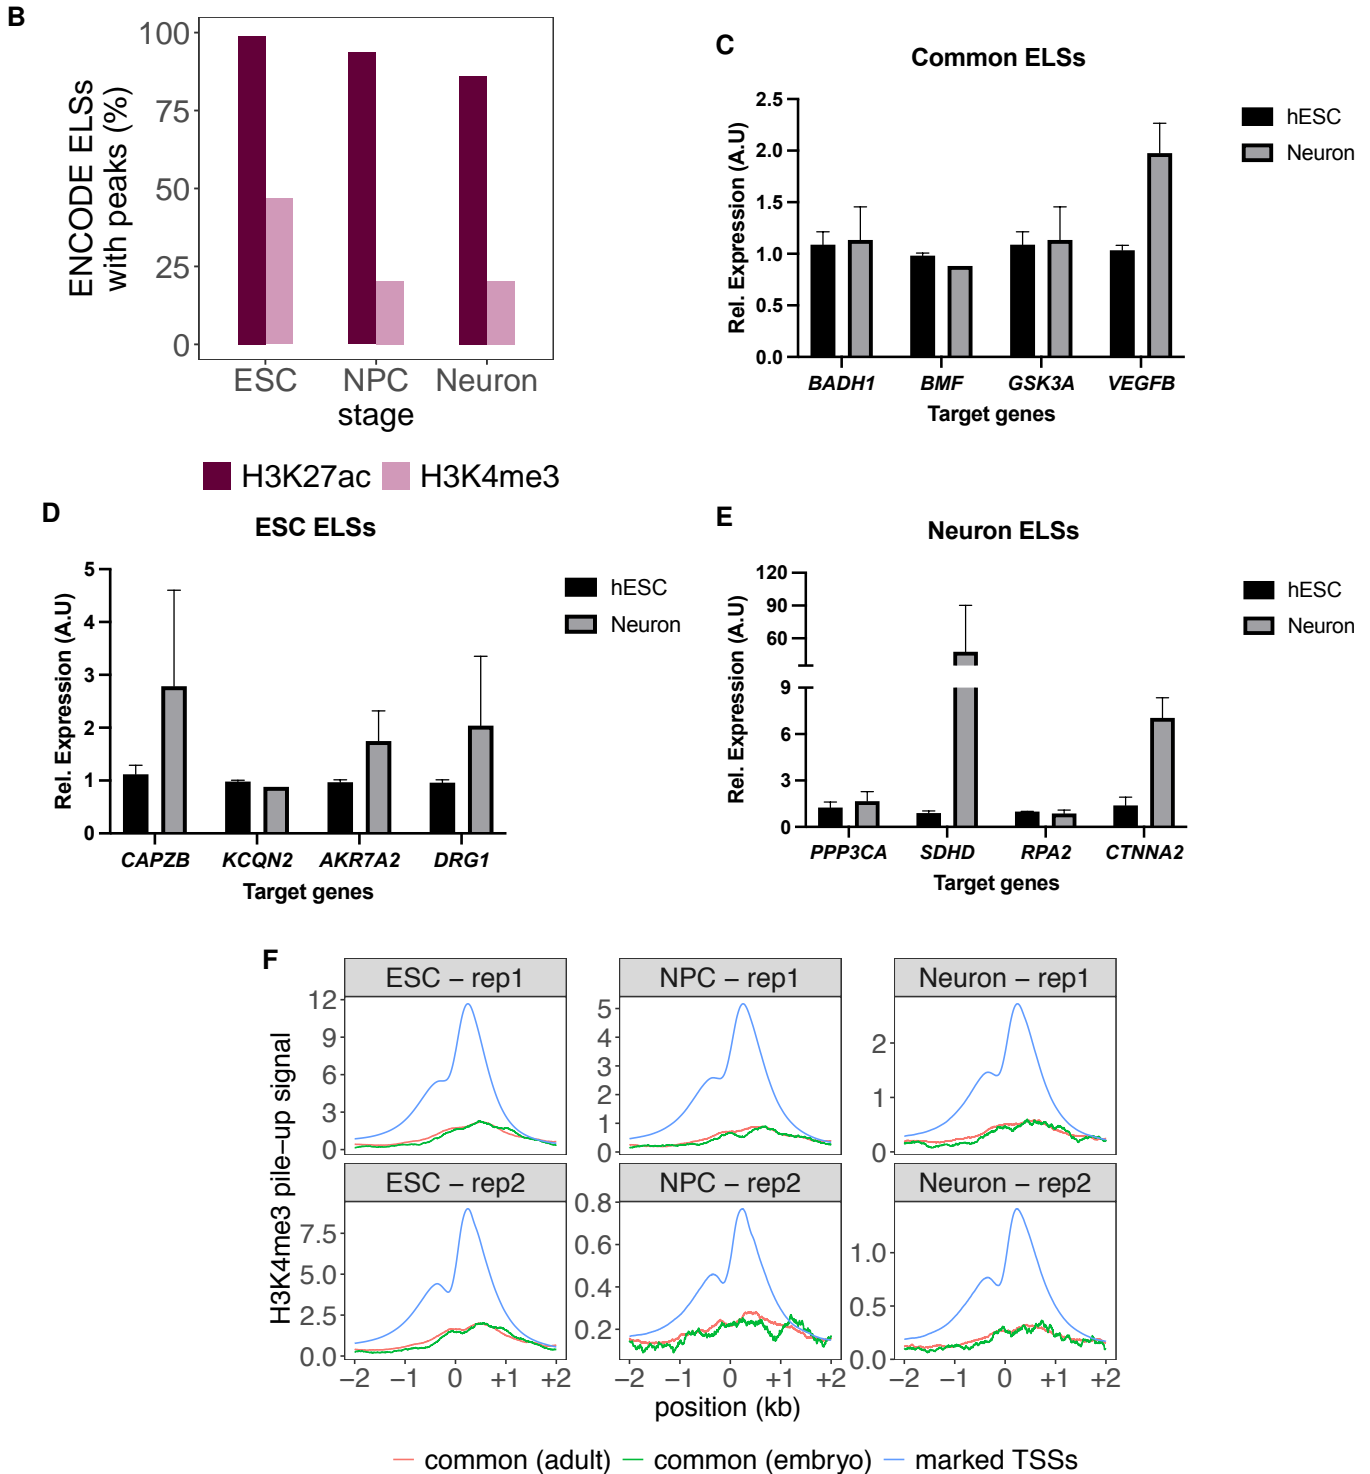

**Supplementary Fig. 4. A:** Scheme depicting the differentiation protocol of ESCs into NPCs and neurons. **B:** Overlap between ENCODE embryonic common ELSS and ChIP-seq peaks of H3K27ac and H3K4me3 observed in ESCs, NPCs and neurons. **C-E:** Gene expression analysis in hESC and ESC-derived neurons of genes targeted by ENCODE ELSS experimentally validated by common (**C**), ESC-specific (**D**) and neuron-specific (**E**) ChIP-seq peaks (see also Supplementary Table 14). Relative quantification was performed against hESC gene expression values and reference gene was *ACTB*. This analysis was performed in triplicates. **F:** Pile-up H3K4me3 signal for ENCODE common embryonic and adult ELSS in ESCs, NPCs and Neurons detected in each of the ChIP-seq replicates. The signal at marked TSSs is comparatively higher than at ELSS, suggesting low promoter activity in the selected ELSS.

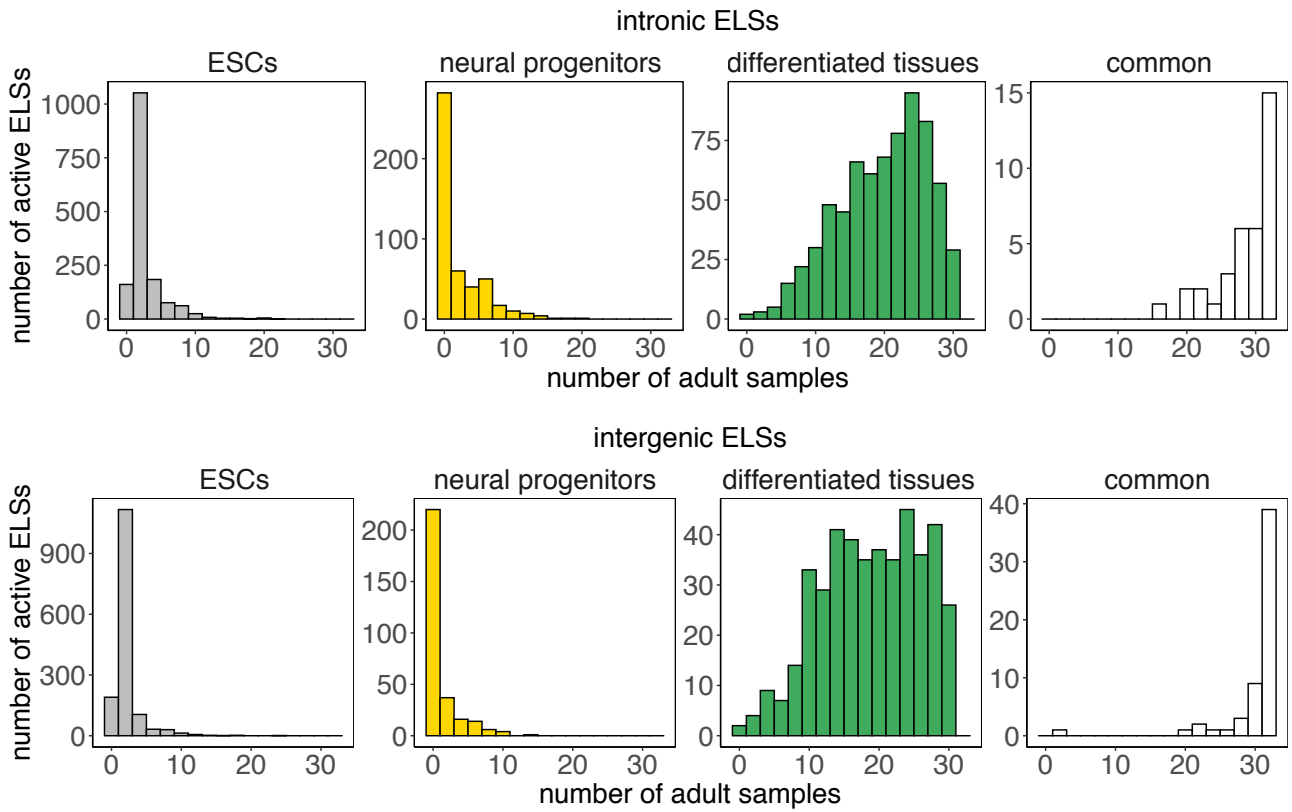

**Supplementary Fig. 5.** Overlap of ELSs between embryonic and adult tissues. ESCs- and neural progenitors-specific ELSs are not active in any or very few adult samples ( $n = 33$ ), independently of their genomic location (intronic vs. intergenic). Instead, most of the embryonic common ELSs, especially those intergenic, are also active in adult tissues. Intermediate distributions are observed for ELSs specific to differentiated embryonic tissues.

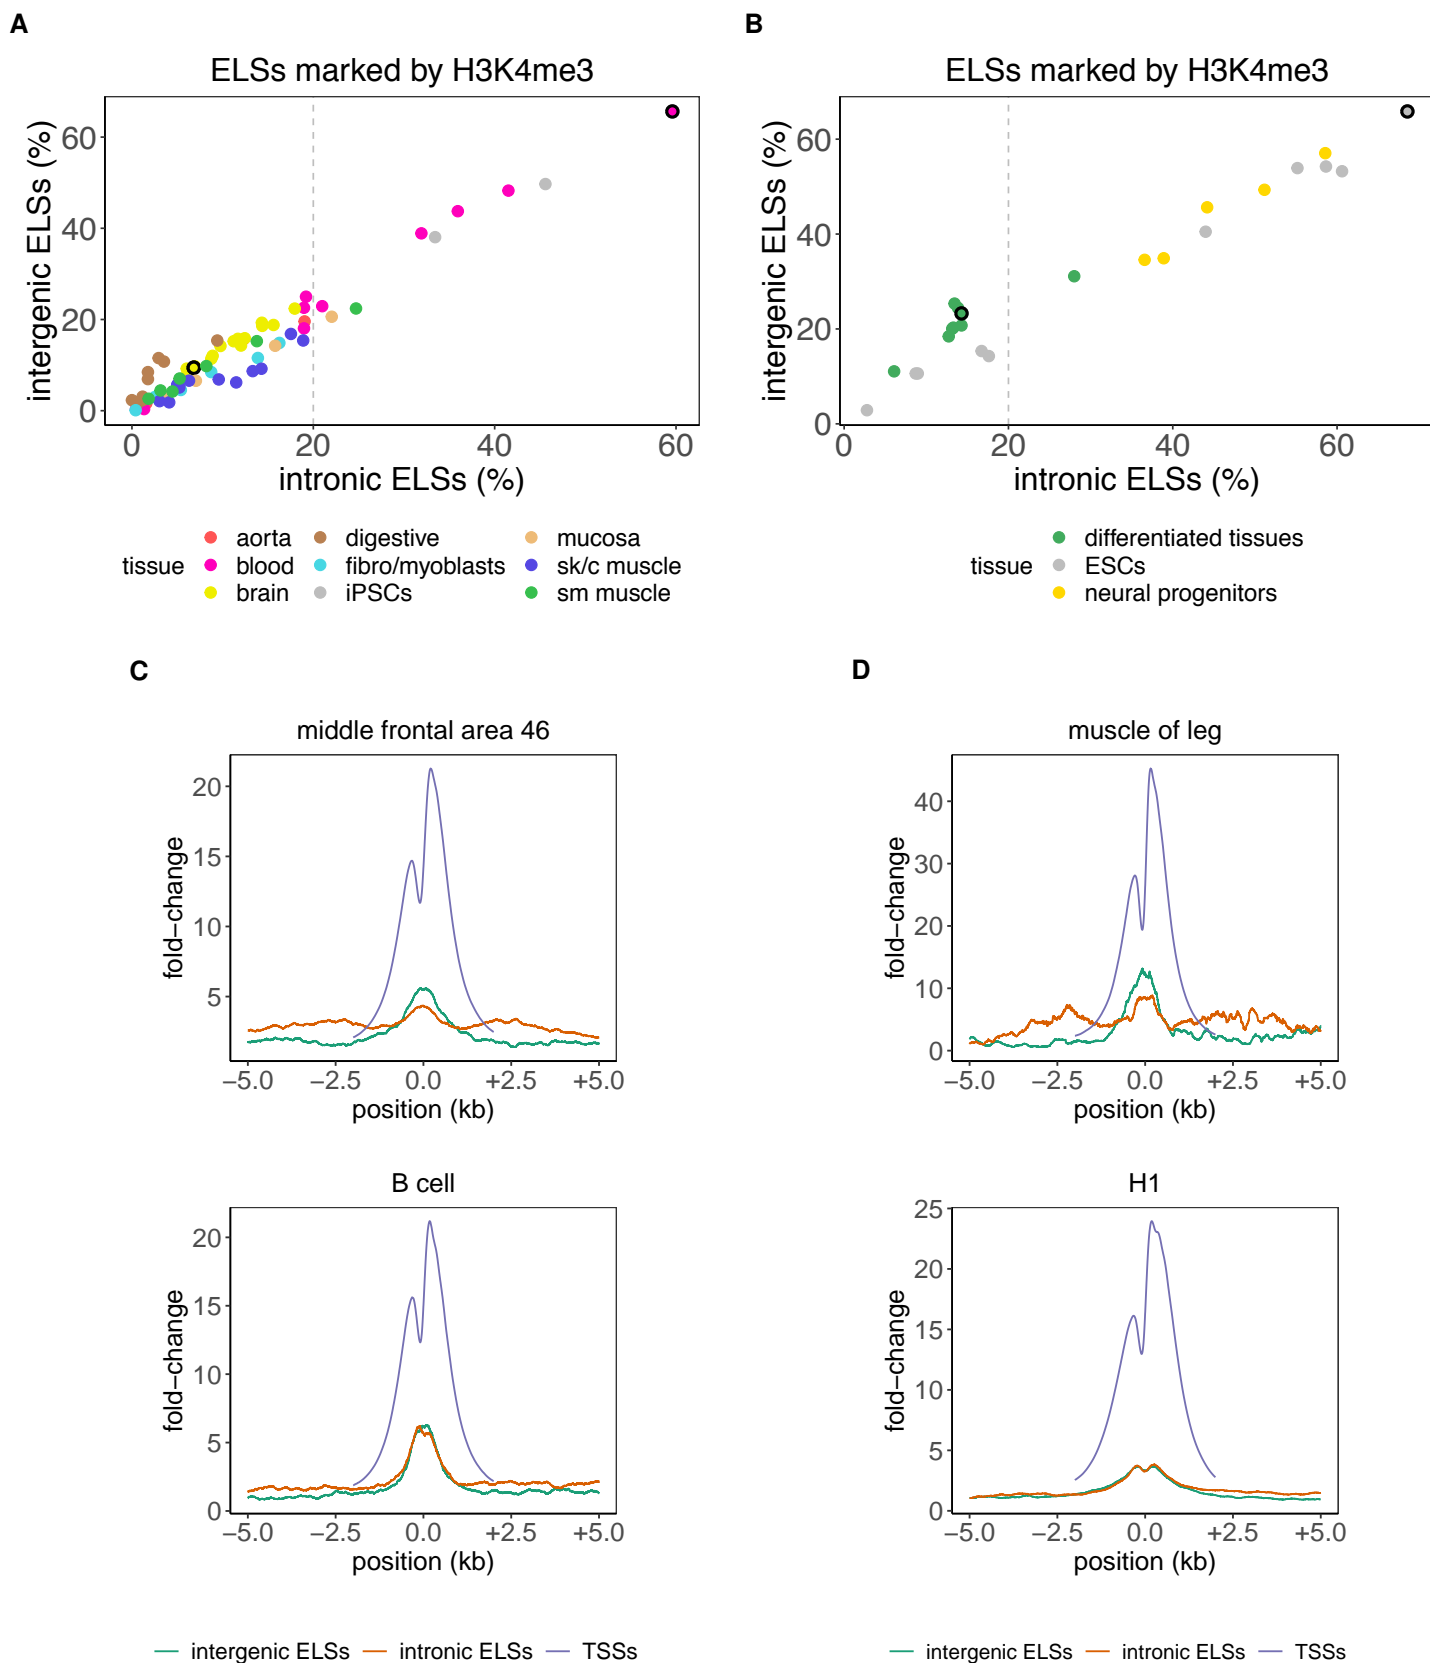

**Supplementary Fig. 6. A, B:** Proportions of intergenic and intronic tissue-specific ELSSs marked (i.e. showing presence of called peaks) by H3K4me3 signal across adult (**A**) and embryonic (**B**) samples (sk/c = skeletal/cardiac; sm = smooth). **C, D:** Aggregated H3K4me3 fold-change signal in marked TSSs, as well as marked intronic and intergenic ELSSs. Two representative samples were selected for adult (**C**) and embryonic (**D**) tissues. The samples used are indicated by bolded circles in **A** (brain: middle frontal area 46; blood: B cell) and **B** (differentiated tissues: muscle of leg; ESCs: H1). The signal at marked TSSs was computed over  $\pm 2$  kb from the TSS. The signal at marked ELSSs, instead, was computed over a  $\pm 5$  kb region from the center of the ELSS.



**A**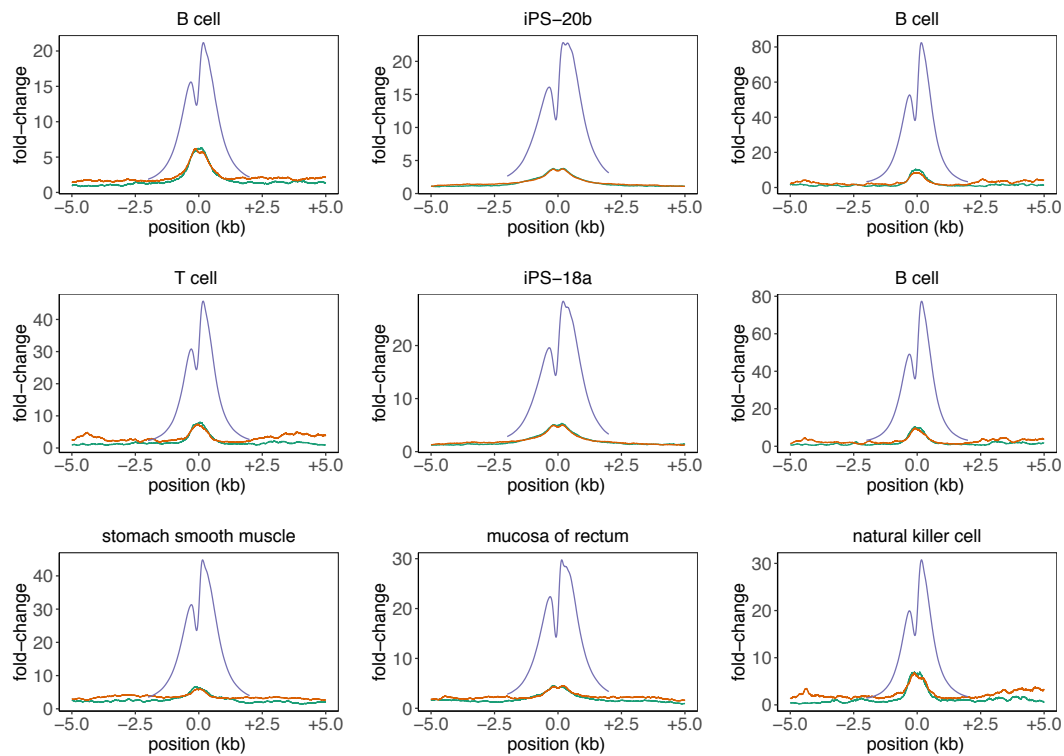**B**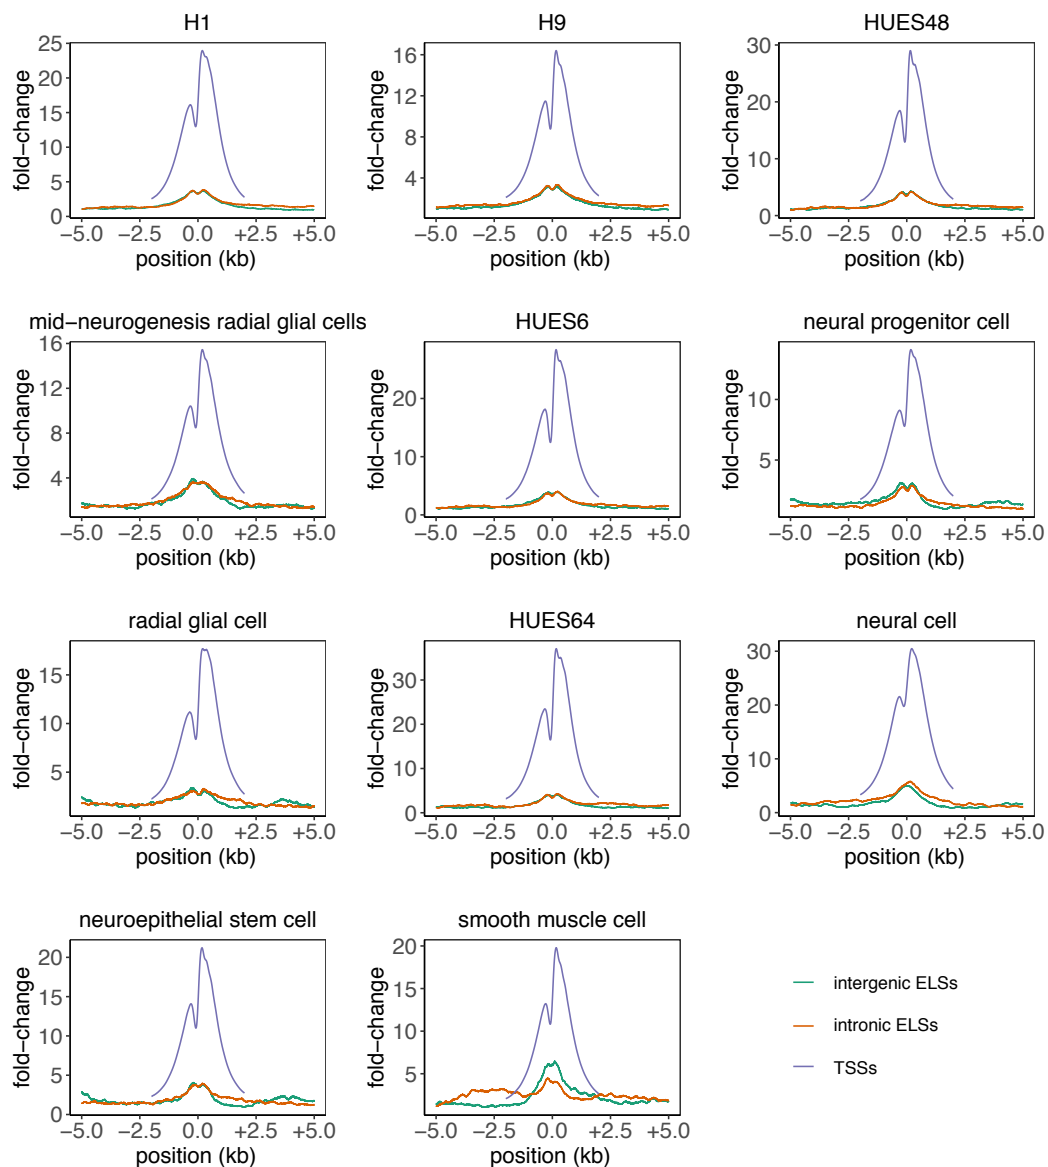

**Supplementary Fig. 7. A, B:** Analogous representations to Supplementary Figs. 6C-D for adult (**A**) and embryonic (**B**) samples reporting  $\geq 20\%$  of ELSs marked by H3K4me3 in Supplementary Figs. 6A-B.

|    | Biosample Term Name                   | Biosample Type                | Samples' Cluster | ENCODE File ID |
|----|---------------------------------------|-------------------------------|------------------|----------------|
| 1  | natural killer cell                   | primary cell                  | blood            | ENCFF529UWB    |
| 2  | T cell                                | primary cell                  | blood            | ENCFF098NHL    |
| 3  | B cell                                | primary cell                  | blood            | ENCFF379TAE    |
| 4  | CD14-positive monocyte                | primary cell                  | blood            | ENCFF967MJU    |
| 5  | peripheral blood mononuclear cell     | primary cell                  | blood            | ENCFF509DPX    |
| 6  | pancreas                              | tissue                        | digestive        | ENCFF681HOL    |
| 7  | body of pancreas                      | tissue                        | digestive        | ENCFF768JUC    |
| 8  | stomach                               | tissue                        | digestive        | ENCFF992HIZ    |
| 9  | right lobe of liver                   | tissue                        | -                | ENCFF476MEG    |
| 10 | iPS-18a                               | cell line                     | iPSCs            | ENCFF920QRH    |
| 11 | iPS-20b                               | cell line                     | iPSCs            | ENCFF231KWX    |
| 12 | bipolar neuron                        | in vitro differentiated cells | -                | ENCFF045GKW    |
| 13 | thyroid gland                         | tissue                        | -                | ENCFF296SZK    |
| 14 | gastrocnemius medialis                | tissue                        | -                | ENCFF322RAX    |
| 15 | endocrine pancreas                    | tissue                        | -                | ENCFF055CJM    |
| 16 | ovary                                 | tissue                        | -                | ENCFF586NXH    |
| 17 | myotube                               | in vitro differentiated cells | fibro/myoblasts  | ENCFF120MMC    |
| 18 | skeletal muscle myoblast              | primary cell                  | fibro/myoblasts  | ENCFF037UZZ    |
| 19 | fibroblast of lung                    | primary cell                  | fibro/myoblasts  | ENCFF495RTY    |
| 20 | aorta                                 | tissue                        | aorta            | ENCFF178GDW    |
| 21 | thoracic aorta                        | tissue                        | aorta            | ENCFF257XAQ    |
| 22 | stomach smooth muscle                 | tissue                        | sm muscle        | ENCFF726JTT    |
| 23 | rectal smooth muscle tissue           | tissue                        | sm muscle        | ENCFF093MDL    |
| 24 | vagina                                | tissue                        | sm muscle        | ENCFF904XYE    |
| 25 | muscle layer of duodenum              | tissue                        | sm muscle        | ENCFF862BGI    |
| 26 | gastrocnemius medialis                | tissue                        | sk/c muscle      | ENCFF863OGG    |
| 27 | right cardiac atrium                  | tissue                        | sk/c muscle      | ENCFF278RUJ    |
| 28 | skeletal muscle tissue                | tissue                        | sk/c muscle      | ENCFF311MNY    |
| 29 | subcutaneous abdominal adipose tissue | tissue                        | sk/c muscle      | ENCFF725QLM    |
| 30 | esophagus                             | tissue                        | -                | ENCFF442HYL    |
| 31 | lung                                  | tissue                        | -                | ENCFF598QTT    |
| 32 | liver                                 | tissue                        | -                | ENCFF645PQQ    |
| 33 | spleen                                | tissue                        | -                | ENCFF821ESA    |
| 34 | mucosa of rectum                      | tissue                        | mucosa           | ENCFF759YFL    |
| 35 | mucosa of rectum                      | tissue                        | mucosa           | ENCFF403IPC    |
| 36 | colonic mucosa                        | tissue                        | mucosa           | ENCFF867TJN    |
| 37 | middle frontal area 46                | tissue                        | brain            | ENCFF070EXF    |
| 38 | caudate nucleus                       | tissue                        | brain            | ENCFF508GKP    |
| 39 | angular gyrus                         | tissue                        | brain            | ENCFF942KAC    |
| 40 | layer of hippocampus                  | tissue                        | brain            | ENCFF159NZA    |
| 41 | substantia nigra                      | tissue                        | brain            | ENCFF233VRB    |
| 42 | temporal lobe                         | tissue                        | brain            | ENCFF810IQU    |
| 43 | cingulate gyrus                       | tissue                        | brain            | ENCFF494WCN    |

**Supplementary Table 1.** ENCODE catalogues of cell type-specific candidate cis-Regulatory Elements (cCREs) for 43 human adult samples. The accession number (ENCODE File ID) allows to uniquely identify the catalogue on the ENCODE portal (<https://www.encodeproject.org/>). The color palette was inspired by the Genotype Tissue Expression (GTEx) Project.

| Samples                 | Tissue-specific ELSs |
|-------------------------|----------------------|
| mucosa                  | 6,205                |
| blood                   | 750                  |
| iPSCs                   | 10,966               |
| fibro/myoblasts         | 2,207                |
| digestive               | 302                  |
| aorta                   | 6,231                |
| smooth muscle           | 2,825                |
| skeletal/cardiac muscle | 5,467                |
| brain                   | 13,054               |

  

| Samples | Common ELSs |
|---------|-------------|
| all     | 555         |

**Supplementary Table 2.** [upper panel] Number of ELSs that are specific to each of the 9 clusters of 33 selected human adult samples. Tissue-specific ELSs are those active in 100% (iPSCs, fibro/myoblasts, digestive, mucosa and aorta) or  $\geq 80\%$  (all other clusters) of the samples within a cluster. In addition, they are active in 0 (iPSCs, fibro/myoblasts, digestive, mucosa and aorta) or at most 1 (all other clusters) outer sample (i.e. a sample that does not belong to the considered cluster). [lower panel] Number of ELSs active in  $\geq 95\%$  (i.e.  $n = 31$ ) of the 33 selected human adult samples (common ELSs).

| Genomic location | Tissue cluster  | FDR     | Odds ratio | Confidence interval |
|------------------|-----------------|---------|------------|---------------------|
| intronic         | mucosa          | 2.0E-07 | 1.62       | 1.35-1.94           |
|                  | iPSCs           | 7.6E-14 | 1.96       | 1.64-2.35           |
|                  | fibro/myoblasts | 3.2E-13 | 2.05       | 1.68-2.49           |
|                  | digestive       | 4.7E-07 | 2.11       | 1.58-2.84           |
|                  | blood           | 1.7E-14 | 2.44       | 1.93-3.07           |
|                  | aorta           | 4.7E-29 | 2.76       | 2.30-3.32           |
|                  | sm muscle       | 3.7E-37 | 3.38       | 2.79-4.11           |
|                  | sk/c muscle     | 1.5E-49 | 3.89       | 3.23-4.69           |
|                  | brain           | 1.8E-66 | 4.66       | 3.90-5.58           |
| exonic           | mucosa          | 9.9E-06 | 0.30       | 0.19-0.51           |
|                  | iPSCs           | 2.0E-06 | 0.28       | 0.18-0.46           |
|                  | fibro/myoblasts | 4.0E-08 | 0.15       | 0.07-0.30           |
|                  | digestive       | 2.7E-03 | 0.15       | 0.02-0.63           |
|                  | blood           | 1.8E-02 | 0.44       | 0.21-0.90           |
|                  | aorta           | 2.1E-04 | 0.38       | 0.24-0.63           |
|                  | sm muscle       | 3.5E-04 | 0.37       | 0.21-0.64           |
|                  | sk/c muscle     | 2.5E-04 | 0.39       | 0.24-0.65           |
|                  | brain           | 3.0E-02 | 0.61       | 0.40-0.99           |
| intergenic       | mucosa          | 8.3E-05 | 0.70       | 0.58-0.84           |
|                  | iPSCs           | 9.0E-10 | 0.58       | 0.48-0.69           |
|                  | fibro/myoblasts | 6.2E-09 | 0.57       | 0.47-0.69           |
|                  | digestive       | 4.3E-05 | 0.55       | 0.41-0.73           |
|                  | blood           | 6.6E-12 | 0.45       | 0.36-0.57           |
|                  | aorta           | 6.0E-24 | 0.40       | 0.33-0.48           |
|                  | sm muscle       | 1.1E-31 | 0.33       | 0.27-0.40           |
|                  | sk/c muscle     | 2.7E-43 | 0.28       | 0.23-0.34           |
|                  | brain           | 1.6E-63 | 0.22       | 0.19-0.26           |

**Supplementary Table 3.** For each cluster of samples we assessed, with Fisher's exact test, significant differences in the proportions of common vs. tissue-specific ELSs that overlap intronic, exonic and intergenic regions.  $p$ -value (FDR-corrected), odds ratio and confidence interval are reported for each test. sk/c = skeletal/cardiac; sm = smooth.

| Group                   | Genes $\cap$ ELSs |             |              |  | Total |
|-------------------------|-------------------|-------------|--------------|--|-------|
|                         | Introns           | Exons       | Both         |  |       |
| mucosa                  | 1,245 (82.56%)    | 51 (3.38%)  | 212 (14.06%) |  | 1,508 |
| blood                   | 335 (85.24%)      | 14 (3.56%)  | 44 (11.20%)  |  | 393   |
| iPSCs                   | 1,910 (84.03%)    | 59 (2.60%)  | 304 (13.37%) |  | 2,273 |
| fibro/myoblasts         | 749 (86.89%)      | 15 (1.74%)  | 98 (11.37%)  |  | 862   |
| digestive               | 129 (90.21%)      | 3 (2.10%)   | 11 (7.69%)   |  | 143   |
| aorta                   | 1,058 (79.31%)    | 47 (3.52%)  | 229 (17.17%) |  | 1,334 |
| smooth muscle           | 656 (81.59%)      | 29 (3.61%)  | 119 (14.80%) |  | 804   |
| skeletal/cardiac muscle | 1,298 (80.82%)    | 49 (3.05%)  | 259 (16.13%) |  | 1,606 |
| brain                   | 1,523 (64.51%)    | 145 (6.14%) | 693 (29.35%) |  | 2,361 |
| common                  | 144 (83.24%)      | 14 (8.09%)  | 15 (8.67%)   |  | 173   |

**Supplementary Table 4.** Number of genes whose introns and/or exons intersect tissue-specific and common ELSs identified in adult samples.

| Tissue                  | GO term    | Description                                               |
|-------------------------|------------|-----------------------------------------------------------|
| aorta                   | GO:0031589 | cell-substrate adhesion                                   |
|                         | GO:0043062 | extracellular structure organization                      |
|                         | GO:2000147 | positive regulation of cell motility                      |
|                         | GO:0043087 | regulation of GTPase activity                             |
|                         | GO:0061564 | axon development                                          |
| blood                   | GO:0042110 | T cell activation                                         |
|                         | GO:0051056 | regulation of small GTPase mediated signal transduction   |
|                         | GO:0002764 | immune response-regulating signaling pathway              |
|                         | GO:0002521 | leukocyte differentiation                                 |
| brain                   | GO:0050900 | leukocyte migration                                       |
|                         | GO:0061564 | axon development                                          |
|                         | GO:0050808 | synapse organization                                      |
|                         | GO:0022604 | regulation of cell morphogenesis                          |
|                         | GO:0099177 | regulation of trans-synaptic signaling                    |
| skeletal/cardiac muscle | GO:0098742 | cell-cell adhesion via plasma-membrane adhesion molecules |
|                         | GO:0003012 | muscle system process                                     |
|                         | GO:0042692 | muscle cell differentiation                               |
|                         | GO:0007517 | muscle organ development                                  |
|                         | GO:0051056 | regulation of small GTPase mediated signal transduction   |
| smooth muscle           | GO:0034330 | cell junction organization                                |
|                         | GO:0043062 | extracellular structure organization                      |
|                         | GO:0003012 | muscle system process                                     |
|                         | GO:0019932 | second-messenger-mediated signaling                       |
|                         | GO:0003013 | circulatory system process                                |
| mucosa                  | GO:0099177 | regulation of trans-synaptic signaling                    |
|                         | GO:0051056 | regulation of small GTPase mediated signal transduction   |
|                         | GO:0038127 | ERBB signaling pathway                                    |
|                         | GO:0034330 | cell junction organization                                |
|                         | GO:0043087 | regulation of GTPase activity                             |
| digestive               | GO:0032970 | regulation of actin filament-based process                |
| fibro/myoblasts         | -          | -                                                         |
|                         | GO:0043087 | regulation of GTPase activity                             |
|                         | GO:0010975 | regulation of neuron projection development               |
|                         | GO:0051056 | regulation of small GTPase mediated signal transduction   |
|                         | GO:0090130 | tissue migration                                          |
| iPSCs                   | GO:2000147 | positive regulation of cell motility                      |
|                         | GO:0010975 | regulation of neuron projection development               |
|                         | GO:0098742 | cell-cell adhesion via plasma-membrane adhesion molecules |
|                         | GO:0022604 | regulation of cell morphogenesis                          |
|                         | GO:0061564 | axon development                                          |
| common                  | GO:0050808 | synapse organization                                      |
|                         | GO:0034330 | cell junction organization                                |
|                         | GO:1903706 | regulation of hemopoiesis                                 |
|                         | GO:1901652 | response to peptide                                       |
|                         | GO:0002521 | leukocyte differentiation                                 |
|                         | GO:0035264 | multicellular organism growth                             |

**Supplementary Table 5.** Significantly enriched GO terms (Biological Process) associated with genes hosting intronic ELSs identified in adult samples. Only the top five enriched terms are shown for each group.

| Tissue                  | Hosting    | GO term                           | Description                                                                                     |
|-------------------------|------------|-----------------------------------|-------------------------------------------------------------------------------------------------|
| aorta                   | intronic   | -                                 | -                                                                                               |
|                         | intergenic | MF:0004499                        | N,N-dimethylaniline monooxygenase activity                                                      |
|                         |            | MF:0004024<br>MF:0004022          | alcohol dehydrogenase activity, zinc-dependent<br>alcohol dehydrogenase (NAD) activity          |
| blood                   | intronic   | -                                 | -                                                                                               |
|                         | intergenic | BP:0019886                        | antigen processing and presentation of exogenous peptide antigen via MHC class II               |
|                         |            | BP:0060333                        | interferon-gamma-mediated signaling pathway                                                     |
| BP:0050852              |            | T cell receptor signaling pathway |                                                                                                 |
| brain                   | intronic   | BP:0000226                        | microtubule cytoskeleton organization                                                           |
|                         |            | BP:0030030                        | cell projection organization                                                                    |
|                         |            | BP:0120036                        | plasma membrane bounded cell projection organization                                            |
|                         | intergenic | CC:0033267                        | axon part                                                                                       |
|                         |            | CC:0005815<br>CC:0015630          | microtubule organizing center<br>microtubule cytoskeleton                                       |
| fibro/myoblasts         | intronic   | CC:0015629                        | actin cytoskeleton                                                                              |
|                         | intergenic | -                                 | -                                                                                               |
| digestive               | intronic   | -                                 | -                                                                                               |
|                         | intergenic | MF:0035591                        | signaling adaptor activity                                                                      |
| mucosa                  | intronic   | BP:0044281                        | small molecule metabolic process                                                                |
|                         |            | MF:0016289                        | CoA hydrolase activity                                                                          |
|                         |            | MF:0008395                        | steroid hydroxylase activity                                                                    |
|                         | intergenic | MF:0016620                        | oxidoreductase activity, acting on the aldehyde or oxo group of donors, NAD or NADP as acceptor |
| skeletal/cardiac muscle | intronic   | BP:0006085                        | acetyl-CoA biosynthetic process                                                                 |
|                         |            | BP:0006520                        | cellular amino acid metabolic process                                                           |
|                         |            | BP:0019752                        | carboxylic acid metabolic process                                                               |
|                         | intergenic | CC:0071556                        | integral component of luminal side endoplasmic reticulum membrane                               |
|                         |            | MF:0042605<br>CC:0098553          | peptide antigen binding<br>luminal side of endoplasmic reticulum membrane                       |
| smooth muscle           | intronic   | MF:0016408                        | C-acyltransferase activity                                                                      |
|                         |            | MF:0019842                        | vitamin binding                                                                                 |
|                         |            | MF:0050662                        | coenzyme binding                                                                                |
|                         | intergenic | -                                 | -                                                                                               |
| iPSCs                   | intronic   | -                                 | -                                                                                               |
|                         | intergenic | -                                 | -                                                                                               |
| common                  | intronic   | -                                 | -                                                                                               |
|                         | intergenic | -                                 | -                                                                                               |

**Supplementary Table 6.** Significantly enriched GO terms associated with the intergenic and intronic eQTL-ELSSs' target genes. Only the three top enriched Biological Process (BP) terms are shown for each analysis, when no BP terms are found Molecular Function (MF) and Cellular Component (CC) terms are shown instead.

| Tissue                  | Hosting    | GO term                  | Description                                                                                                       |
|-------------------------|------------|--------------------------|-------------------------------------------------------------------------------------------------------------------|
| aorta                   | intronic   | BP:0014910               | regulation of smooth muscle cell migration                                                                        |
|                         |            | BP:0048660               | regulation of smooth muscle cell proliferation                                                                    |
|                         |            | BP:0003205               | cardiac chamber development                                                                                       |
|                         | intergenic | MF:0004722<br>CC:0031012 | protein serine/threonine phosphatase activity<br>extracellular matrix                                             |
| blood                   | intronic   | BP:0150079               | negative regulation of neuroinflammatory response                                                                 |
|                         |            | BP:0042093               | T-helper cell differentiation                                                                                     |
|                         |            | BP:0002294               | CD4-positive, alpha-beta T cell differentiation in immune response                                                |
|                         | intergenic | BP:0048006               | antigen processing and presentation,<br>endogenous lipid antigen via MHC class Ib                                 |
|                         |            | BP:0061737<br>BP:0048007 | leukotriene signaling pathway<br>antigen processing and presentation,<br>exogenous lipid antigen via MHC class Ib |
| brain                   | intronic   | BP:1990709               | presynaptic active zone organization                                                                              |
|                         |            | BP:0098698               | postsynaptic specialization assembly                                                                              |
|                         |            | BP:0099068               | postsynapse assembly                                                                                              |
|                         | intergenic | BP:0042426               | choline catabolic process                                                                                         |
|                         |            | BP:0055070<br>BP:1902003 | copper ion homeostasis<br>regulation of amyloid-beta formation                                                    |
| fibro/myoblasts         | intronic   | BP:0072273               | metanephric nephron morphogenesis                                                                                 |
|                         |            | BP:0061383               | trabecula morphogenesis                                                                                           |
|                         |            | BP:0030010               | establishment of cell polarity                                                                                    |
|                         | intergenic | BP:0007442               | hindgut morphogenesis                                                                                             |
|                         |            | BP:1902260<br>BP:0001946 | negative regulation of delayed rectifier potassium channel activity<br>lymphangiogenesis                          |
| iPSCs                   | intronic   | BP:0045636               | positive regulation of melanocyte differentiation                                                                 |
|                         |            | BP:0061550               | cranial ganglion development                                                                                      |
|                         |            | BP:0045986               | negative regulation of smooth muscle contraction                                                                  |
|                         | intergenic | BP:0021825               | substrate-dependent cerebral cortex tangential migration                                                          |
|                         |            | BP:0043383<br>BP:0030318 | negative T cell selection<br>melanocyte differentiation                                                           |
| skeletal/cardiac muscle | intronic   | CC:0071005               | U2-type precatalytic spliceosome                                                                                  |
|                         |            | CC:0031674               | I band                                                                                                            |
|                         |            | CC:0030018               | Z disc                                                                                                            |
| smooth muscle           | intergenic | -                        | -                                                                                                                 |
|                         | intronic   | -                        | -                                                                                                                 |
| digestive               | intergenic | -                        | -                                                                                                                 |
|                         | intronic   | -                        | -                                                                                                                 |
| mucosa                  | intergenic | -                        | -                                                                                                                 |
|                         | intronic   | -                        | -                                                                                                                 |
| common                  | intergenic | BP:0007156               | homophilic cell adhesion via plasma membrane adhesion molecules                                                   |
|                         |            | BP:0098742               | cell-cell adhesion via plasma-membrane adhesion molecules                                                         |
|                         |            | BP:0034728               | nucleosome organization                                                                                           |

**Supplementary Table 7.** Significantly enriched GO terms associated with the intergenic and intronic Hi-C-ELSSs' target genes. Only the three top enriched Biological Process (BP) terms are shown for each analysis, when no BP terms are found Molecular Function (MF) and Cellular Component (CC) terms are shown instead.

| Tissue                  | Hosting  | GO term    | Description                                                       |
|-------------------------|----------|------------|-------------------------------------------------------------------|
| brain                   | host     | GO:2000809 | positive regulation of synaptic vesicle clustering                |
|                         |          | GO:2000807 | regulation of synaptic vesicle clustering                         |
|                         |          | GO:1990709 | presynaptic active zone organization                              |
|                         |          | GO:0048790 | maintenance of presynaptic active zone structure                  |
|                         |          | GO:1905274 | regulation of modification of postsynaptic actin cytoskeleton     |
|                         | non-host | GO:1902527 | positive regulation of protein monoubiquitination                 |
|                         |          | GO:0030150 | protein import into mitochondrial matrix                          |
|                         |          | GO:0030033 | microvillus assembly                                              |
|                         |          | GO:1901976 | regulation of cell cycle checkpoint                               |
|                         |          | GO:0044743 | protein transmembrane import into intracellular organelle         |
| skeletal/cardiac muscle | host     | GO:0055003 | cardiac myofibril assembly                                        |
|                         |          | GO:0046580 | negative regulation of Ras protein signal transduction            |
|                         |          | GO:0048747 | muscle fiber development                                          |
|                         |          | GO:0051058 | negative regulation of small GTPase mediated signal transduction  |
|                         |          | GO:0055013 | cardiac muscle cell development                                   |
|                         | non-host | -          |                                                                   |
| blood                   | host     | GO:1905449 | regulation of Fc-gamma receptor signaling pathway in phagocytosis |
|                         |          | GO:1903613 | regulation of protein tyrosine phosphatase activity               |
|                         |          | GO:0050855 | regulation of B cell receptor signaling pathway                   |
|                         |          | GO:0045589 | regulation of regulatory T cell differentiation                   |
|                         |          | GO:0050853 | B cell receptor signaling pathway                                 |
|                         | non-host | -          |                                                                   |
| aorta                   | host     | GO:0014910 | regulation of smooth muscle cell migration                        |
|                         |          | GO:0014909 | smooth muscle cell migration                                      |
|                         |          | GO:0034446 | substrate adhesion-dependent cell spreading                       |
|                         |          | GO:0014812 | muscle cell migration                                             |
|                         |          | GO:0007179 | transforming growth factor beta receptor signaling pathway        |
|                         | non-host | GO:0001503 | ossification                                                      |
|                         |          | GO:0071495 | cellular response to endogenous stimulus                          |
|                         |          | GO:0009719 | response to endogenous stimulus                                   |
| fibro/myoblasts         | host     | GO:0051781 | positive regulation of cell division                              |
|                         |          | GO:0030010 | establishment of cell polarity                                    |
|                         |          | GO:0007163 | establishment or maintenance of cell polarity                     |
|                         |          | GO:0046578 | regulation of Ras protein signal transduction                     |
|                         |          | GO:0010631 | epithelial cell migration                                         |
|                         | non-host | GO:0010463 | mesenchymal cell proliferation                                    |
|                         |          | GO:0030879 | mammary gland development                                         |
|                         |          | GO:0061448 | connective tissue development                                     |
|                         |          | GO:0007178 | transmembrane receptor protein serine/threonine kinase signaling  |
|                         |          | GO:0008284 | positive regulation of cell proliferation                         |
| iPSCs                   | host     | GO:0003056 | regulation of vascular smooth muscle contraction                  |
|                         |          | GO:0071625 | vocalization behavior                                             |
|                         |          | GO:0060292 | long-term synaptic depression                                     |
|                         |          | GO:0097106 | postsynaptic density organization                                 |
|                         |          | GO:0009187 | cyclic nucleotide metabolic process                               |
|                         | non-host | -          | -                                                                 |
| common                  | non-host | GO:0035278 | miRNA mediated inhibition of translation                          |
|                         |          | GO:0040033 | negative regulation of translation, ncRNA-mediated                |
|                         |          | GO:0045974 | regulation of translation, ncRNA-mediated                         |
|                         |          | GO:0034644 | cellular response to UV                                           |
|                         |          | GO:0045047 | protein targeting to ER                                           |

**Supplementary Table 8.** Significantly enriched GO terms associated with the target genes of Hi-C-ELSS' that are host and non-host of these ELSS. Only the five top enriched Biological Process (BP) terms are shown.



| <b>Tissue</b>           | <b>Region</b> | <b>Transcription factors</b>                                               |
|-------------------------|---------------|----------------------------------------------------------------------------|
| brain                   | intronic      | MEF2A, HINFP, SOX8, ZBTB3, ZBTB26, HAND2, SOX4, SOX2                       |
|                         | intergenic    | SOX13                                                                      |
| blood                   | intronic      | ELF3, RUNX1                                                                |
|                         | intergenic    | ELF3, RUNX2                                                                |
| skeletal/cardiac muscle | intronic      | MEF2A, GSC, TGIF2, NR2F2                                                   |
|                         | intergenic    | -                                                                          |
| smooth muscle           | intronic      | -                                                                          |
|                         | intergenic    | -                                                                          |
| fibro/myoblasts         | intronic      | RUNX1, ZNF263, BATF                                                        |
|                         | intergenic    | RUNX2, HAND2, TEAD3, BATF                                                  |
| iPSCs                   | intronic      | POU5F1, SOX3, ZEB1, TEAD2, VEZF1, TBX1, FOXJ1, ZNF384                      |
|                         | intergenic    | POU5F1, ZEB1, GLIS2, SRY, SOX3, GCM1, ZNF519, CUX2, MYB, GATA3, ZFX, GATA4 |
| mucosa                  | intronic      | ETV4, CDX2, RARA, HNF4G, KIF1                                              |
|                         | intergenic    | ZEB1, THAP1, ZNF416, ZNF384, OTX1, RARA, KLF10                             |
| digestive               | intronic      | TFCP2                                                                      |
|                         | intergenic    | -                                                                          |
| aorta                   | intronic      | -                                                                          |
|                         | intergenic    | NFIX                                                                       |
| common                  | intronic      | ELK4(ETS)                                                                  |
|                         | intergenic    | HOXA9, TFDP1, ATF1                                                         |

**Supplementary Table 9.** Transcription factors corresponding to the significantly enriched transcription factor binding sites (TFBSs) reported by HOMER in each group of ELSs and genomic location.

|    | <b>Biosample Term Name</b>            | <b>Biosample Type</b>         | <b>Samples' Group</b>  | <b>ENCODE File ID</b> |
|----|---------------------------------------|-------------------------------|------------------------|-----------------------|
| 1  | ■ HUES6                               | cell line                     | stem cells (ESCs)      | ENCFF205SDB           |
| 2  | ■ HUES64                              | cell line                     | stem cells (ESCs)      | ENCFF180QLH           |
| 3  | ■ HUES48                              | cell line                     | stem cells (ESCs)      | ENCFF086FKD           |
| 4  | ■ mesendoderm                         | in vitro differentiated cells | -                      | ENCFF620BVM           |
| 5  | ■ H9                                  | cell line                     | stem cells (ESCs)      | ENCFF021HBJ           |
| 6  | ■ H9                                  | cell line                     | stem cells (ESCs)      | ENCFF505OUS           |
| 7  | ■ H1                                  | cell line                     | stem cells (ESCs)      | ENCFF051OUV           |
| 8  | ■ mesodermal cell                     | in vitro differentiated cells | -                      | ENCFF250CGY           |
| 9  | ■ endodermal cell                     | in vitro differentiated cells | -                      | ENCFF138DOQ           |
| 10 | ■ neuroepithelial stem cell           | in vitro differentiated cells | neural progenitors     | ENCFF138OGZ           |
| 11 | ■ ectodermal cell                     | in vitro differentiated cells | -                      | ENCFF332EYK           |
| 12 | ■ radial glial cell                   | in vitro differentiated cells | neural progenitors     | ENCFF593TNG           |
| 13 | ■ neural progenitor cell              | in vitro differentiated cells | neural progenitors     | ENCFF112ZGF           |
| 14 | ■ mid-neurogenesis radial glial cells | in vitro differentiated cells | neural progenitors     | ENCFF376XBS           |
| 15 | ■ neural stem progenitor cell         | in vitro differentiated cells | neural progenitors     | ENCFF455CQW           |
| 16 | ■ neural cell                         | in vitro differentiated cells | neural progenitors     | ENCFF477EUQ           |
| 17 | ■ smooth muscle cell                  | in vitro differentiated cells | differentiated tissues | ENCFF281QON           |
| 18 | ■ thymus                              | tissue                        | differentiated tissues | ENCFF059PHA           |
| 19 | ■ adrenal gland                       | tissue                        | differentiated tissues | ENCFF840ANN           |
| 20 | ■ IMR-90                              | cell line                     | -                      | ENCFF469PXS           |
| 21 | ■ fibroblast of lung                  | primary cell                  | differentiated tissues | ENCFF292NZP           |
| 22 | ■ muscle of trunk                     | tissue                        | differentiated tissues | ENCFF800YES           |
| 23 | ■ muscle of leg                       | tissue                        | differentiated tissues | ENCFF941JIE           |
| 24 | ■ stomach                             | tissue                        | differentiated tissues | ENCFF198WHL           |
| 25 | ■ hepatocyte                          | in vitro differentiated cells | differentiated tissues | ENCFF093BQM           |
| 26 | ■ large intestine                     | tissue                        | differentiated tissues | ENCFF903RGX           |
| 27 | ■ small intestine                     | tissue                        | differentiated tissues | ENCFF543DVJ           |

**Supplementary Table 10.** ENCODE catalogues of cell type-specific candidate cis-Regulatory Elements (cCREs) for 27 human embryonic samples. The accession number (ENCODE File ID) allows to uniquely identify the catalogue on the ENCODE portal (<https://www.encodeproject.org/>).

| Samples                | Group-specific ELSs |
|------------------------|---------------------|
| ESCs                   | 3,112               |
| neural progenitors     | 784                 |
| differentiated tissues | 1,166               |

  

| Samples | Common ELSs |
|---------|-------------|
| all     | 94          |

**Supplementary Table 11.** [upper panel] Number of ELSs that are specific to each of the 3 groups of 22 selected human embryonic samples. Group-specific ELSs are active in  $\geq 80\%$  of the samples within a group, and in at most 1 outer sample (i.e. a sample that does not belong to the considered group). [lower panel] Number of ELSs active in 100% of the 22 selected human embryonic samples (common ELSs).

| Genomic location | Samples' Group         | FDR     | Odds ratio | Confidence interval |
|------------------|------------------------|---------|------------|---------------------|
| intronic         | ESCs                   | 3.1E-02 | 1.67       | 1.08-2.62           |
|                  | neural progenitors     | 1.3E-04 | 2.45       | 1.55-3.92           |
|                  | differentiated tissues | 9.9E-05 | 2.48       | 1.58-3.94           |
| exonic           | ESCs                   | 7.6E-01 | 0.87       | 0.14-36.11          |
|                  | neural progenitors     | 1.0E+00 | 1.57       | 0.23-67.33          |
|                  | differentiated tissues | 8.1E-01 | 2.04       | 0.33-84.53          |
| intergenic       | ESCs                   | 3.1E-02 | 0.60       | 0.39-0.93           |
|                  | neural progenitors     | 9.9E-05 | 0.40       | 0.25-0.63           |
|                  | differentiated tissues | 9.9E-05 | 0.39       | 0.24-0.60           |

**Supplementary Table 12.** For each group of samples we assessed, with Fisher's exact test, significant differences in the proportions of common vs. group-specific ELSs that overlap intronic, exonic and intergenic regions.  $p$ -value (FDR-corrected), odds ratio and confidence interval are reported for each test.

| Group                  | Introns      | Genes $\cap$ ELSs |            |  | Total |
|------------------------|--------------|-------------------|------------|--|-------|
|                        |              | Exons             | Both       |  |       |
| ESCs                   | 907 (89.27%) | 21 (2.07%)        | 88 (8.66%) |  | 1,016 |
| neural progenitors     | 359 (87.56%) | 13 (3.17%)        | 38 (9.27%) |  | 410   |
| differentiated tissues | 492 (86.16%) | 24 (4.20%)        | 55 (9.63%) |  | 571   |
| common                 | 33 (82.50%)  | 1 (2.50%)         | 6 (15.00%) |  | 40    |

**Supplementary Table 13.** Number of genes whose introns and/or exons intersect group-specific and common ELSs identified in embryonic samples.

| Gene          | Coordinates            | ELS ID       | Tissue | Location   | Hosting  | Peak ChIP-seq K27ac | Primer                                            |
|---------------|------------------------|--------------|--------|------------|----------|---------------------|---------------------------------------------------|
| <i>PPP3CA</i> | 4:102023034-102023302  | EH37E0737564 | brain  | intronic   | host     | neuron 1            | F:GCCAACACTCGCTACCTCTT<br>R:AAGGCCACAAAATACAGCAC  |
| <i>CAPZB</i>  | 1:19670858-19672569    | EH37E0073593 | brain  | intronic   | host     | ESC 1               | F:CCTGGTCCCCAGTCTATGTG<br>R:ACCACCTTGTCTCTGGCAAT  |
| <i>SDHD</i>   | 11:113019264-113019880 | EH37E0240118 | brain  | intronic   | non-host | neuron 2            | F:CAGAATGGTGTGGAGTGCAG<br>R:AGTGGAGAGATGCAGCCTTG  |
| <i>AKR7A2</i> | 1:19670858-19672569    | EH37E0073593 | brain  | intronic   | non-host | ESC 1               | F:GCCGAGATCTGTACCCTCTG<br>R:GAAGAGCTCCGTTTCCACCT  |
| <i>RPA2</i>   | 1:28307519-28308214    | EH37E0078769 | brain  | intronic   | non-host | neuron 1/2          | F:CCTTCTCAAGCCGAAAAGAA<br>R:TCATCAACCAAAGTGGCAGA  |
| <i>DRG1</i>   | 22:31735086-31735685   | EH37E0629324 | brain  | intronic   | non-host | ESC 1               | F:TTACTCCAAAGGGTGGTGGT<br>R:CAAATCCAATTTCGAGCATCA |
| <i>CSPG5</i>  | 3:47577542-47578617    | EH37E0656905 | brain  | intergenic | non-host | ESC 1               | F:CCTACTGCTGCTGTTTCTGG<br>R:CTGCCCTTACCAGCTCTT    |
| <i>CTNNA2</i> | 2:80527433-80528886    | EH37E0528734 | brain  | intronic   | host     | neuron 1            | F:CAGAAAGGCTGTGCTGATGA<br>R:CTTGTCTGCTACGCACATC   |
| <i>KCNQ2</i>  | 20:62086208-62086923   | EH37E0609018 | brain  | intronic   | host     | ESC 1/2, neuron 1   | F:CACAGGCAGAAGCACTTTGA<br>R:GAGAGGTTGGTGGCGTAGAA  |
| <i>ACTB</i>   | 7:5733031-5733564      | EH37E0886351 | common | intronic   | non-host | all                 | F:ATTGGCAATGAGCGGTTT<br>R:TGAAGGTAGTTTTCGTGGATGC  |
| <i>BAHD1</i>  | 15:40390946-40391339   | EH37E0363650 | common | intronic   | non-host | all                 | F:GATGATGAGCCTCCTGTGGT<br>R:GCGATGCAAACACTTCATTC  |
| <i>BMF</i>    | 15:40390946-40391339   | EH37E0363650 | common | intronic   | host     | all                 | F:CAGTGCATTGCAGACCAGTT<br>R:AAGGTTGTGCAGGAAGAGGA  |
| <i>GSK3A</i>  | 19:40939210-40940400   | EH37E0490611 | common | intergenic | non-host | all                 | F:CTCATTGGGGTTCGTGTACC<br>R:GATCTGCAGCTCTCGTTCT   |
| <i>VEGFB</i>  | 11:62320405-62321311   | EH37E0221959 | common | intronic   | non-host | all                 | F:CTGGCCACCAGAGGAAAGT<br>R:CATGAGCTCCACAGTCAAGG   |

**Supplementary Table 14.** Selection of brain-specific and common ENCODE ELSs overlapping with hESC-derived neural maturation ChIP-seq. Target genes were identified by Hi-C interaction, and only genes regulated by one ELS in our ENCODE analysis were selected. Specifically, we report: the ELSs coordinates and ID; the type of ELS (brain-specific or common, based on the classification derived from ENCODE adult samples); the ELS genomic location (intronic vs. intergenic); the nature of the targeted genes (host or non-host); the presence of peaks in the neural maturation ChIP-seq experiments; the primers used for gene expression analysis.

| Group                  | GO term     | Description                                                             |
|------------------------|-------------|-------------------------------------------------------------------------|
| neural progenitors     | BP: 0060291 | long-term synaptic potentiation                                         |
|                        | BP: 0050770 | regulation of axonogenesis                                              |
|                        | BP: 0097061 | dendritic spine organization                                            |
|                        | CC: 0008328 | ionotropic glutamate receptor complex                                   |
|                        | CC: 0098878 | neurotransmitter receptor complex                                       |
|                        | CC: 0014069 | postsynaptic density                                                    |
|                        | MF: 0004970 | ionotropic glutamate receptor activity                                  |
|                        | MF: 0005089 | rho guanyl-nucleotide exchange factor activity                          |
| differentiated tissues | MF: 0008013 | beta-catenin binding                                                    |
|                        | BP: 1900020 | positive regulation of protein kinase C activity                        |
|                        | BP: 1900040 | regulation of interleukin-2 secretion                                   |
|                        | BP: 0060766 | negative regulation of androgen receptor signaling pathway              |
|                        | CC: 0098651 | basement membrane collagen trimer                                       |
|                        | CC: 0098644 | complex of collagen trimmers                                            |
|                        | CC: 0005583 | fibrillar collagen trimer                                               |
|                        | MF: 0044548 | S100 protein binding                                                    |
| ESCs                   | MF: 0035252 | UDP-xylosyltransferase activity                                         |
|                        | MF: 0030020 | extracellular matrix structural constituent conferring tensile strength |
|                        | BP: 0042908 | xenobiotic transport                                                    |
|                        | BP: 0045986 | negative regulation of smooth muscle contraction                        |
|                        | BP: 0098698 | postsynaptic specialization assembly                                    |
|                        | CC: 0099092 | postsynaptic density, intracellular component                           |
|                        | CC: 0031304 | intrinsic component of mitochondrial inner membrane                     |
|                        | CC: 0008328 | ionotropic glutamate receptor complex                                   |
| common                 | MF: 0008146 | sulfotransferase activity                                               |
|                        | MF: 0005547 | phosphatidylinositol-3,4,5-triphosphate binding                         |
|                        | MF: 0070300 | phosphatidic acid binding                                               |
|                        | CC: 0071565 | nBAF complex                                                            |
|                        | CC: 0016514 | SWI/SNF complex                                                         |
|                        | CC: 0070603 | NI/SNF superfamily-type complex                                         |

**Supplementary Table 15.** Significantly enriched GO terms associated with the genes harboring intronic ELSs identified in embryonic samples. Only the top three enriched terms are shown in each analysis (BP: Biological Process; CC: Cellular Component; MF: Molecular Function).

| Experiment ID | bigBed File ID | bigWig File ID | Biosample Term Name               | Samples Cluster |
|---------------|----------------|----------------|-----------------------------------|-----------------|
| ENCSR960EVO   | ENCFF150IXD    | ENCFF106UPY    | aorta                             | aorta           |
| ENCSR957BPJ   | ENCFF778YRL    | ENCFF786OKT    | aorta                             | aorta           |
| ENCSR984KWT   | ENCFF096QKQ    | ENCFF600PFS    | thoracic aorta                    | aorta           |
| ENCSR930HLX   | ENCFF496WSG    | ENCFF712GED    | thoracic aorta                    | aorta           |
| ENCSR939UQD   | ENCFF006PUX    | ENCFF526XGT    | B cell                            | blood           |
| ENCSR000DQR   | ENCFF358FDS    | ENCFF119SDL    | B cell                            | blood           |
| ENCSR878JSF   | ENCFF911TMM    | ENCFF804THE    | B cell                            | blood           |
| ENCSR000DQP   | ENCFF946HAD    | ENCFF831LDI    | B cell                            | blood           |
| ENCSR796FCS   | ENCFF317WLK    | ENCFF231OTU    | CD14-positive monocyte            | blood           |
| ENCSR395YXN   | ENCFF516NBV    | ENCFF692YGS    | T cell                            | blood           |
| ENCSR570AUC   | ENCFF876VUG    | ENCFF428SHV    | natural killer cell               | blood           |
| ENCSR206JRX   | ENCFF215JSM    | ENCFF796FFT    | peripheral blood mononuclear cell | blood           |
| ENCSR443SLY   | ENCFF274NFA    | ENCFF573QMJ    | peripheral blood mononuclear cell | blood           |
| ENCSR368YPC   | ENCFF541SEP    | ENCFF303YKC    | peripheral blood mononuclear cell | blood           |
| ENCSR275EAG   | ENCFF641SRH    | ENCFF482WUA    | peripheral blood mononuclear cell | blood           |
| ENCSR535XRY   | ENCFF434HTE    | ENCFF624ECX    | angular gyrus                     | brain           |
| ENCSR057RET   | ENCFF471CNA    | ENCFF586RDL    | angular gyrus                     | brain           |
| ENCSR486QMV   | ENCFF413UOM    | ENCFF433GYN    | caudate nucleus                   | brain           |
| ENCSR840KVX   | ENCFF922OIZ    | ENCFF284JOB    | caudate nucleus                   | brain           |
| ENCSR032BMQ   | ENCFF835HDX    | ENCFF893IET    | cingulate gyrus                   | brain           |
| ENCSR693GVU   | ENCFF883GXX    | ENCFF478BHA    | cingulate gyrus                   | brain           |
| ENCSR383AEO   | ENCFF082JYH    | ENCFF080Xaq    | layer of hippocampus              | brain           |
| ENCSR956CFX   | ENCFF572YMX    | ENCFF266RWF    | layer of hippocampus              | brain           |
| ENCSR418JIS   | ENCFF764ZYN    | ENCFF226DRF    | layer of hippocampus              | brain           |
| ENCSR157EML   | ENCFF008YZE    | ENCFF438HBY    | middle frontal area 46            | brain           |
| ENCSR401VZL   | ENCFF539MAM    | ENCFF476LCL    | middle frontal area 46            | brain           |
| ENCSR551QXE   | ENCFF230LRO    | ENCFF531LTO    | substantia nigra                  | brain           |
| ENCSR883QMZ   | ENCFF547SJD    | ENCFF277PPF    | substantia nigra                  | brain           |
| ENCSR717AJD   | ENCFF405ITQ    | ENCFF625DED    | temporal lobe                     | brain           |
| ENCSR477BHF   | ENCFF939UVF    | ENCFF565UAK    | temporal lobe                     | brain           |
| ENCSR876DCP   | ENCFF102LZH    | ENCFF527JEF    | body of pancreas                  | digestive       |
| ENCSR588PZN   | ENCFF447CFW    | ENCFF867LQS    | body of pancreas                  | digestive       |
| ENCSR554RQQ   | ENCFF485WGE    | ENCFF982WVN    | body of pancreas                  | digestive       |
| ENCSR747VED   | ENCFF703WUC    | ENCFF623TEM    | pancreas                          | digestive       |
| ENCSR315LPR   | ENCFF718GRW    | ENCFF779EMW    | pancreas                          | digestive       |
| ENCSR063HOI   | ENCFF205VUE    | ENCFF752TMT    | stomach                           | digestive       |
| ENCSR489ZLL   | ENCFF210MKU    | ENCFF244PVV    | stomach                           | digestive       |
| ENCSR129NCV   | ENCFF248SFF    | ENCFF706PVF    | stomach                           | digestive       |
| ENCSR843UEZ   | ENCFF350QEB    | ENCFF230GOG    | stomach                           | digestive       |
| ENCSR492BHN   | ENCFF892PIW    | ENCFF647UUQ    | stomach                           | digestive       |
| ENCSR000DWZ   | ENCFF219NNT    | ENCFF672JJF    | fibroblast of lung                | fibro/myoblasts |
| ENCSR000AMW   | ENCFF307BRU    | ENCFF648WWQ    | fibroblast of lung                | fibro/myoblasts |
| ENCSR915QOL   | ENCFF498GDR    | ENCFF837XME    | fibroblast of lung                | fibro/myoblasts |
| ENCSR000ANZ   | ENCFF104CCE    | ENCFF731WEZ    | myotube                           | fibro myoblasts |
| ENCSR000ANK   | ENCFF286OEL    | ENCFF020MPQ    | skeletal muscle myoblast          | fibro/myoblasts |
| ENCSR596NOF   | ENCFF881WJB    | ENCFF211KTI    | skeletal muscle myoblast          | fibro/myoblasts |
| ENCSR505JQC   | ENCFF779COY    | ENCFF637LKZ    | iPS-18a                           | iPSCs           |
| ENCSR989RAL   | ENCFF206LCO    | ENCFF500GFH    | iPS-20b                           | iPSCs           |
| ENCSR322FGP   | ENCFF817MAX    | ENCFF956GBB    | colonic mucosa                    | mucosa          |
| ENCSR577DVK   | ENCFF874PAW    | ENCFF202MXN    | colonic mucosa                    | mucosa          |
| ENCSR276BXF   | ENCFF059ORI    | ENCFF983WKA    | mucosa of rectum                  | mucosa          |
| ENCSR146DAL   | ENCFF911MLR    | ENCFF174ZGI    | mucosa of rectum                  | mucosa          |

|             |             |             |                                       |                         |
|-------------|-------------|-------------|---------------------------------------|-------------------------|
| ENCSR098OLN | ENCFF036BUW | ENCFF203DXZ | gastrocnemius medialis                | skeletal/cardiac muscle |
| ENCSR206STN | ENCFF182VGO | ENCFF074GLQ | gastrocnemius medialis                | skeletal/cardiac muscle |
| ENCSR785DJD | ENCFF801JCZ | ENCFF995MET | gastrocnemius medialis                | skeletal/cardiac muscle |
| ENCSR972ETR | ENCFF828XLK | ENCFF596MDR | gastrocnemius medialis                | skeletal/cardiac muscle |
| ENCSR548LZS | ENCFF321AWE | ENCFF358SLL | right cardiac atrium                  | skeletal/cardiac muscle |
| ENCSR767NIF | ENCFF159MIF | ENCFF364HCQ | skeletal muscle tissue                | skeletal/cardiac muscle |
| ENCSR346KKE | ENCFF705TXS | ENCFF534NZZ | skeletal muscle tissue                | skeletal/cardiac muscle |
| ENCSR703CYD | ENCFF040JUJ | ENCFF149LVI | subcutaneous abdominal adipose tissue | skeletal/cardiac muscle |
| ENCSR294PQF | ENCFF100ODV | ENCFF245YFA | subcutaneous abdominal adipose tissue | skeletal/cardiac muscle |
| ENCSR605NNZ | ENCFF140MBX | ENCFF076YGE | subcutaneous abdominal adipose tissue | skeletal/cardiac muscle |
| ENCSR501FTL | ENCFF237JIN | ENCFF487IMQ | subcutaneous abdominal adipose tissue | skeletal/cardiac muscle |
| ENCSR923IUU | ENCFF578DGE | ENCFF711BWR | subcutaneous abdominal adipose tissue | skeletal/cardiac muscle |
| ENCSR075PTL | ENCFF744GGI | ENCFF679MIG | muscle layer of duodenum              | smooth muscle           |
| ENCSR264APD | ENCFF997ISM | ENCFF180UOM | muscle layer of duodenum              | smooth muscle           |
| ENCSR953GFW | ENCFF455LOH | ENCFF225DFI | rectal muscle smooth tissue           | smooth muscle           |
| ENCSR168PQI | ENCFF127NZZ | ENCFF734LFM | stomach muscle smooth                 | smooth muscle           |
| ENCSR532FEO | ENCFF931EAQ | ENCFF143PWQ | stomach muscle smooth                 | smooth muscle           |
| ENCSR647HAQ | ENCFF550ZZM | ENCFF674GXQ | vagina                                | smooth muscle           |
| ENCSR258UUX | ENCFF707ODD | ENCFF071GTI | vagina                                | smooth muscle           |

**Supplementary Table 16.** List of H3K4me3 ChIP-seq experiments used to perform the analyses in Supplementary Figs. 6A and 6C (see also "re: enrichment of putative alternative promoters in intronic and intergenic tissue-specific ELSs"). The accession numbers (Experiment ID, bigBed file ID, bigWig File ID) allow to uniquely identify the experiment and corresponding files on the ENCODE portal (<https://www.encodeproject.org/>).

| Experiment ID | bigBed File ID | bigWig File ID | Biosample Term Name                 | Samples Cluster        |
|---------------|----------------|----------------|-------------------------------------|------------------------|
| ENCSR715KGX   | ENCFF297HKN    | ENCFF493TPV    | adrenal gland                       | differentiated tissues |
| ENCSR442ZOI   | ENCFF766JNH    | ENCFF634XSS    | hepatocyte                          | differentiated tissues |
| ENCSR413QXO   | ENCFF855JOO    | ENCFF191CFV    | large intestine                     | differentiated tissues |
| ENCSR128QKM   | ENCFF783UIQ    | ENCFF849QUA    | muscle of leg                       | differentiated tissues |
| ENCSR714SGY   | ENCFF752MYO    | ENCFF703OHL    | muscle of trunk                     | differentiated tissues |
| ENCSR237QFJ   | ENCFF749ZSB    | ENCFF768LAW    | small intestine                     | differentiated tissues |
| ENCSR515PKY   | ENCFF728OWX    | ENCFF394FMW    | smooth muscle cell                  | differentiated tissues |
| ENCSR202RXT   | ENCFF162TRZ    | ENCFF690GLN    | stomach                             | differentiated tissues |
| ENCSR308ZMD   | ENCFF017BXO    | ENCFF384FQP    | thymus                              | differentiated tissues |
| ENCSR922CAT   | ENCFF980JXF    | ENCFF075WFF    | mid-neurogenesis radial glial cells | neural progenitors     |
| ENCSR608VNA   | ENCFF123NTR    | ENCFF379BNK    | neural cell                         | neural progenitors     |
| ENCSR661MUS   | ENCFF963JVR    | ENCFF644BAH    | neural progenitor cell              | neural progenitors     |
| ENCSR662PLB   | ENCFF655SBQ    | ENCFF915BXI    | neuroepithelial stem cell           | neural progenitors     |
| ENCSR433PUR   | ENCFF791AVT    | ENCFF038HSI    | radial glial cell                   | neural progenitors     |
| ENCSR003SSR   | ENCFF063RLE    | ENCFF168UGH    | H1                                  | ESCs                   |
| ENCSR000AMG   | ENCFF127WKA    | ENCFF044CKA    | H1                                  | ESCs                   |
| ENCSR443YAS   | ENCFF451DZQ    | ENCFF065VIF    | H1                                  | ESCs                   |
| ENCSR814XPE   | ENCFF798FMO    | ENCFF347APS    | H1                                  | ESCs                   |
| ENCSR019SQX   | ENCFF908LKM    | ENCFF742QHK    | H1                                  | ESCs                   |
| ENCSR716ZJH   | ENCFF044DDA    | ENCFF796WXE    | H9                                  | ESCs                   |
| ENCSR043VGU   | ENCFF636FLM    | ENCFF494BBO    | H9                                  | ESCs                   |
| ENCSR153SGD   | ENCFF904TVW    | ENCFF930LWY    | HUES48                              | ESCs                   |
| ENCSR176ABZ   | ENCFF126FDP    | ENCFF112VWV    | HUES6                               | ESCs                   |
| ENCSR894OYM   | ENCFF498ZKF    | ENCFF854OTV    | HUES64                              | ESCs                   |

**Supplementary Table 17.** List of H3K4me3 ChIP-seq experiments used to perform the analyses in Supplementary Figs. 6B and 6D (see also "re: enrichment of putative alternative promoters in intronic and intergenic tissue-specific ELSs"). The accession numbers (Experiment ID, bigBed file ID, bigWig File ID) allow to uniquely identify the experiment and corresponding files on the ENCODE portal (<https://www.encodeproject.org/>).
